# Supplementary material for: Up-regulated matrix metalloproteinase activity in soil-transmitted helminth–tuberculosis co-infection is associated with increased lung pathology
Source: PubMed Central journal article supplement (PMC11780722; doi:10.1183/13993003.01445-2024), 2025-01-30

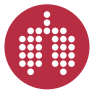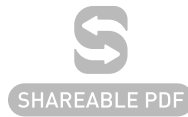

# Up-regulated matrix metalloproteinase activity in soil-transmitted helminth–tuberculosis co-infection is associated with increased lung pathology

Maria-Cristina I. Loader <sup>1,2,3</sup>, Sory Vasquez Alves<sup>4</sup>, Robert H. Gilman <sup>3,4,5</sup>, Jorge Coronel <sup>3</sup>, Carmen Taquiri<sup>3</sup>, Neusa Vasquez Alves<sup>4</sup>, Fabiola Díaz-Soria <sup>6</sup>, Salomón Durand <sup>7,8</sup>, Sean T. Kelleher <sup>9</sup>, Teresa Jacob<sup>10</sup>, William H. Elson <sup>11</sup>, Daniela E. Kirwan <sup>1</sup> and Jon S. Friedland <sup>1</sup>

<sup>1</sup>Institute for Infection and Immunity, St George's University of London, London, UK. <sup>2</sup>Department of Infectious Disease, Faculty of Medicine, Imperial College London, London, UK. <sup>3</sup>Laboratorio de Investigación de Enfermedades Infecciosas, Laboratorios de Investigación y Desarrollo, Facultad de Ciencias y Filosofía, Universidad Peruana Cayetano Heredia, Lima, Perú. <sup>4</sup>Área de Investigación y Desarrollo, Asociación Benéfica PRISMA, Lima, Perú. <sup>5</sup>Department of International Health, Bloomberg School of Hygiene and Public Health, Johns Hopkins University, Baltimore, MD, USA. <sup>6</sup>Centro de Investigación en Enfermedades Tropicales "Maxime Kuczynski", Instituto Nacional de Salud, Lima, Perú. <sup>7</sup>Instituto Peruano de Investigaciones en Salud, Loreto, Perú. <sup>8</sup>Dirección Regional de Salud, Loreto, Perú. <sup>9</sup>Department of Pediatric Cardiology, Children's Health Ireland at Crumlin, Dublin, Ireland. <sup>10</sup>St George's University Hospital NHS Foundation Trust, London, UK. <sup>11</sup>Nuffield Department of Primary Care Health Sciences, University of Oxford, Oxford, UK.

Corresponding author: Maria-Cristina I. Loader ([mloader@sgul.ac.uk](mailto:mloader@sgul.ac.uk))

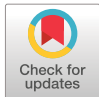

Shareable abstract (@ERSpublications)

**Individuals with soil-transmitted helminth (STH) infection are more likely to have active pulmonary TB. Both TB and STH infections are independently associated with elevated plasma MMPs, which correlate with worse lung pathology.** <https://bit.ly/3VgGWjm>

**Cite this article as:** Loader M-CI, Vasquez Alves S, Gilman RH, *et al.* Up-regulated matrix metalloproteinase activity in soil-transmitted helminth–tuberculosis co-infection is associated with increased lung pathology. *Eur Respir J* 2025; 65: 2401445 [DOI: 10.1183/13993003.01445-2024].

This PDF extract can be shared freely online.

*To the Editor:*

Copyright ©The authors 2025.

This version is distributed under the terms of the Creative Commons Attribution Licence 4.0.

Received: 17 June 2024

Accepted: 27 Nov 2024

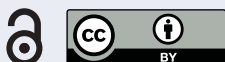

Supplement: ERJ-01445-2024.Shareable.pdf [file ERJ-01445-2024.Shareable.pdf]
